# Supplementary material for: Low-Level Laser Treatment Induces the Blood-Brain Barrier Opening and the Brain Drainage System Activation: Delivery of Liposomes into Mouse Glioblastoma
Source: MDPI journal article supplement (doi:10.3390/pharmaceutics15020567), 2023-02-08
Supplement: s1 [file s1]

## Supplementary information

# Low-Level Laser Treatment Induces the Blood-Brain Barrier Opening and the Brain Drainage System Activation: Delivery of Liposomes into Mouse Glioblastoma

Oxana Semyachkina-Glushkovskaya <sup>1,2,\*</sup>, Denis Bragin <sup>3,4</sup>, Olga Bragina <sup>3</sup>, Sergey Socolovski <sup>5</sup>, Alexander Shirokov <sup>2,6</sup>, Ivan Fedosov <sup>2</sup>, Vasily Ageev <sup>2</sup>, Inna Blokhina <sup>2</sup>, Alexander Dubrovsky <sup>2</sup>, Valeria Telnova <sup>2</sup>, Andrey Terskov <sup>2</sup>, Alexander Khorovodov <sup>2</sup>, Daria Elovenko <sup>2</sup>, Arina Evsukova <sup>2</sup>, Maria Zhoy <sup>2</sup>, Ilana Agranovich <sup>2</sup>, Elena Vodovozova <sup>7</sup>, Anna Alekseeva <sup>7</sup>, Jürgen Kurths <sup>1,2,8</sup> and Edik Rafailov <sup>5</sup>

<sup>1</sup> Institute of Physics, Humboldt University, Newtonstrasse 15, 12489 Berlin, Germany

<sup>2</sup> Department of Biology, Saratov State University, Astrakhanskaya 82, 410012 Saratov, Russia

<sup>3</sup> Lovelace Biomedical Research Institute, Albuquerque, NM 87108, USA

<sup>4</sup> Department of Neurology, University of New Mexico School of Medicine, Albuquerque, NM 87131, USA

<sup>5</sup> Optoelectronics and Biomedical Photonics Group, Aston Institute of Photonic Technologies, Aston University, Birmingham B4 7ET, UK

<sup>6</sup> Institute of Biochemistry and Physiology of Plants and Microorganisms, Russian Academy of Sciences, Prospekt Entuziastov 13, 410049 Saratov, Russia

<sup>7</sup> Shemyakin-Ovchinnikov Institute of Bioorganic Chemistry, Russian Academy of Sciences, Miklukho-Maklaya 16/10, 117997 Moscow, Russia

<sup>8</sup> Potsdam Institute for Climate Impact Research, Department of Complexity Science, Telegrafenberg A31, 14473 Potsdam, Germany

\* Correspondence: glushkovskaya@mail.ru; Tel.: +7-8452-519220

**Table S1.** The 1268 nm-induced increase in the BBB permeability to the EBAC in healthy mice

| <b>Laser 1268 nm<br/>intensities, mW</b> | <b>Content of EBAC in the brain (µg/g tissue)</b> |                                          |                                           |
|------------------------------------------|---------------------------------------------------|------------------------------------------|-------------------------------------------|
|                                          | <b>1 h after 1268 nm<br/>irradiation</b>          | <b>4 h after 1268 nm<br/>irradiation</b> | <b>24 h after 1268 nm<br/>irradiation</b> |
| No irradiation<br>(the control group)    | 0.11±0.03 (0)                                     | 0.12±0.01                                | 0.13±0.03                                 |
| 10                                       | 0.30±0.07 * (30)                                  | 0.14±0.02                                | 0.11±0.01                                 |
| 20                                       | 0.48±0.01 ** (40)                                 | 0.11±0.04                                | 0.13±0.01                                 |
| 30                                       | 0.46±0.04 ** (30)                                 | 0.12±0.01                                | 0.14±0.02                                 |
| 40                                       | 0.48±0.03 ** (50)                                 | 0.10±0.07                                | 0.11±0.02                                 |
| 50                                       | 0.58±0.01 *** (60)                                | 0.12±0.04                                | 0.11±0.03                                 |
| 60                                       | 0.6±0.01 *** (60)                                 | 0.15±0.08                                | 0.12±0.05                                 |
| <b>70</b>                                | <b>1.17±0.09 *** (100)</b>                        | 0.11±0.01                                | 0.14±0.04                                 |
| <b>80</b>                                | <b>0.73±0.07 *** (100)</b>                        | 0.16±0.06                                | 0.12±0.08                                 |
| <b>90</b>                                | <b>0.75±0.03 *** (100)</b>                        | 0.13±0.04                                | 0.11±0.03                                 |

\*p>0.05; \*\* p>0.01; \*\*\* p>0.001 vs. the control group (no laser irradiation), n=10 in each group, the Mann–Whitney–Wilcoxon test; (0-100) – the number of mice with BBBO expressed as % of total number of mice, the selected area by green color illustrates 100% of mice with BBBO after laser application.

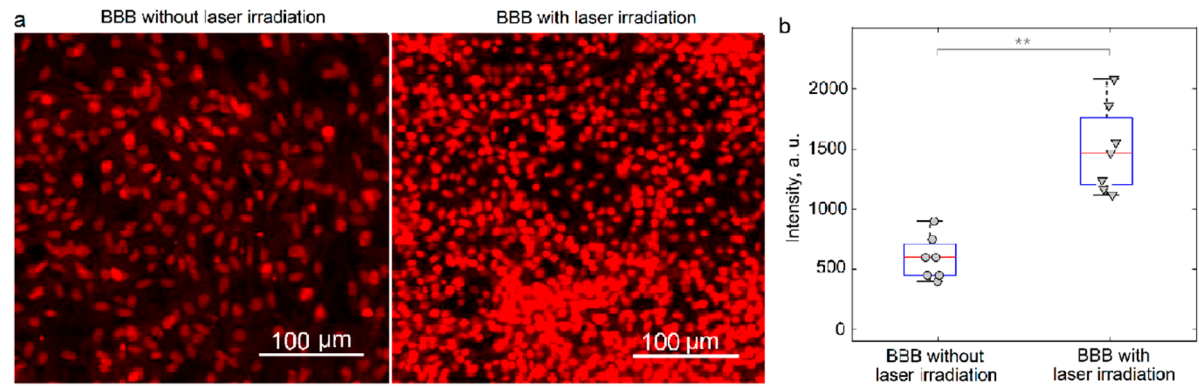

**Figure S1.** Analysis of the ROS production in the *in vitro* BBB model: a - The confocal imaging of DHE-IF in the groups, including the BBB cells without the 1268 nm laser irradiation and the BBB treated by the single 1268 nm laser irradiation (70 mW); b - The quantitative analysis of the ROS production in the tested groups. The data are presented as Means  $\pm$  SEM,  $p < 0.001$  between groups, the Wilcoxon, Mann-Whitney U tests.

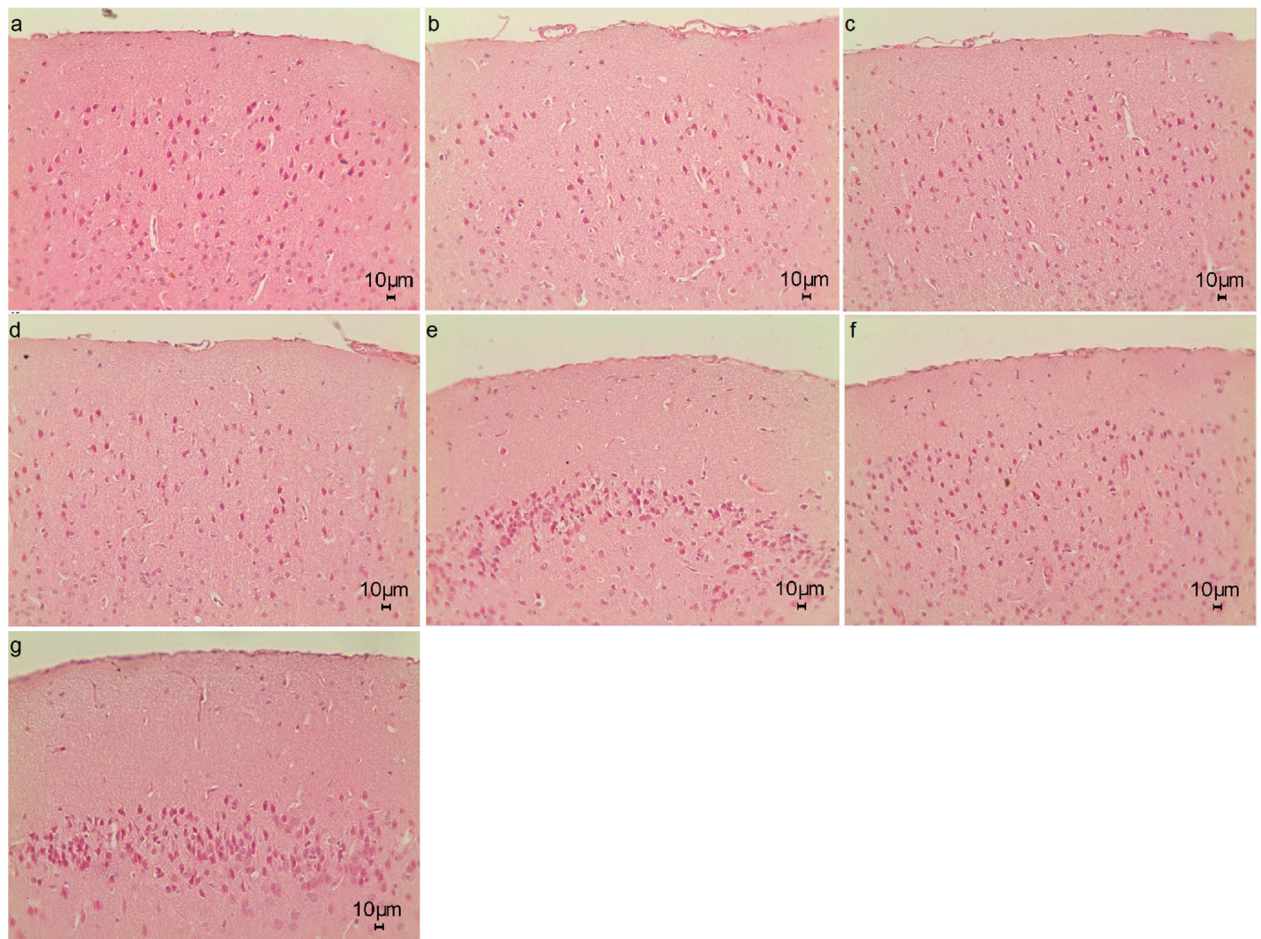

**Figure S2.** The histological analysis of the brain tissues without (a) and 1h (b-d, 70-80-90 mW, respectively) and 4hrs (e-g, 70-80-90 mW, respectively) after the laser 1268 nm irradiation,  $n=7$  in each group

**Table S2.** Temperature ( $^{\circ}\text{C}$ ) at the external surface of skull and the brain cortex without and after the 1268 nm laser irradiation in healthy mice

| Intensity of the laser 1268 nm irradiation, mW | No Laser         | 10               | 20               | 30               | 40               | 50               | 60               | 70               | 80               | 90               |
|------------------------------------------------|------------------|------------------|------------------|------------------|------------------|------------------|------------------|------------------|------------------|------------------|
| The skull external surface                     | 33.12 $\pm$ 0.10 | 32.15 $\pm$ 0.12 | 33.10 $\pm$ 0.13 | 33.04 $\pm$ 0.09 | 32.06 $\pm$ 0.11 | 33.20 $\pm$ 0.15 | 35.03 $\pm$ 0.04 | 35.19 $\pm$ 0.11 | 35.12 $\pm$ 0.06 | 35.06 $\pm$ 0.10 |
| Under the skull on the cortex surface          | 37.11 $\pm$ 0.12 | 37.22 $\pm$ 0.09 | 37.08 $\pm$ 0.14 | 37.00 $\pm$ 0.03 | 37.26 $\pm$ 0.10 | 37.22 $\pm$ 0.31 | 37.86 $\pm$ 0.25 | 37.94 $\pm$ 0.18 | 37.88 $\pm$ 0.21 | 37.76 $\pm$ 0.02 |
